# Supplementary material for: A systematic approach to understand the mechanism of action of the bisthiazolium compound T4 on the human malaria parasite, Plasmodium falciparum
Source: PubMed Central journal article supplement (PMC2596145; doi:10.1186/1471-2164-9-513), 2008-10-30

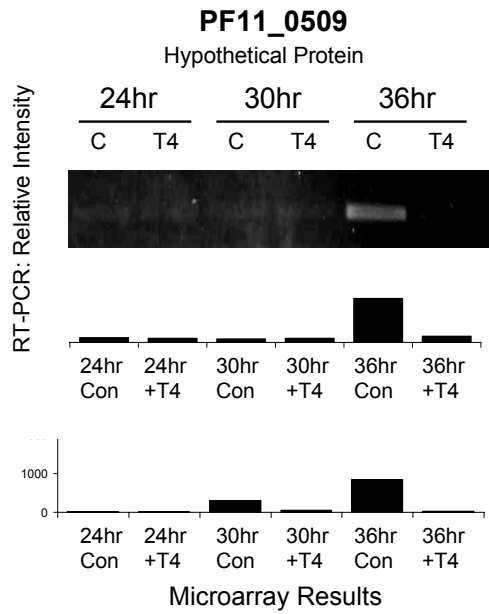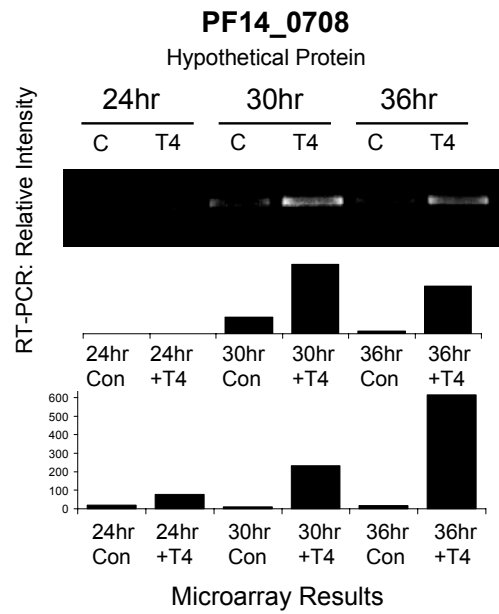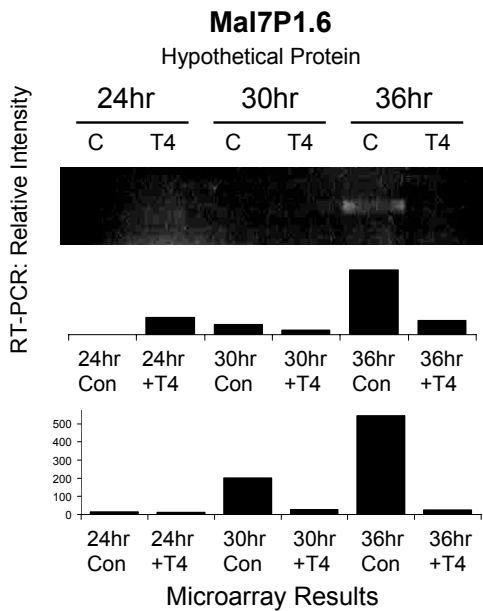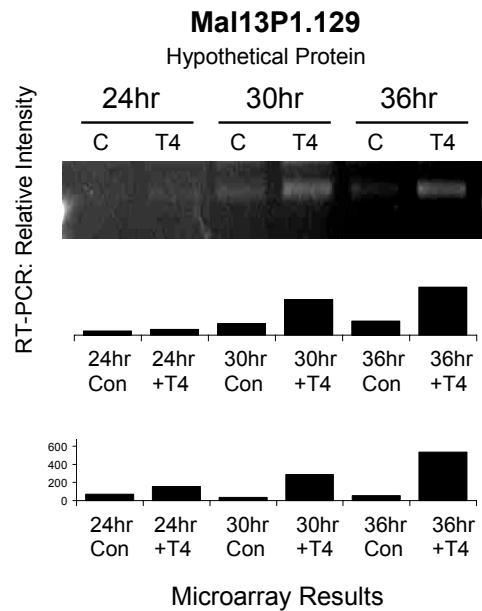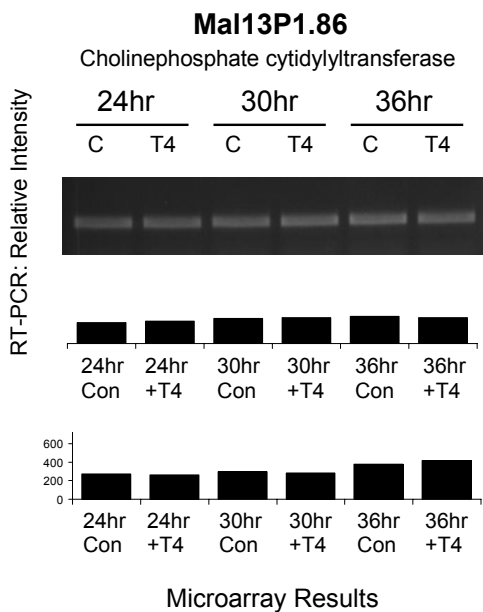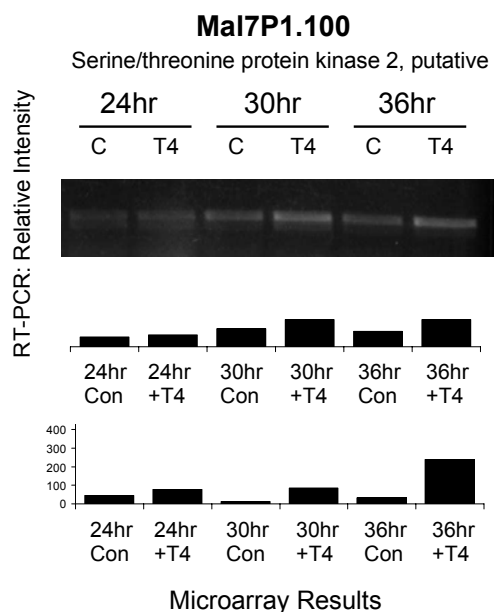

Supplement: 1471-2164-9-513-S1.pdf [file 1471-2164-9-513-S1.pdf]
